# Supplementary material
Source: PubMed Central journal article supplement (PMC8415134)
Supplement: NIHMS1734713-supplement-supplemental_figure.pdf [file NIHMS1734713-supplement-supplemental_figure.pdf]

**Supplemental Figure 1.** Regional variation in odds of receiving a Kidney Donor Profile Index score (KDPI) $\leq$ 20% deceased donor kidney for transplant recipients with Estimated Post-Transplanted Survival score (EPTS) $\leq$ 20% at listing, January 1, 2015 – March 31, 2018.

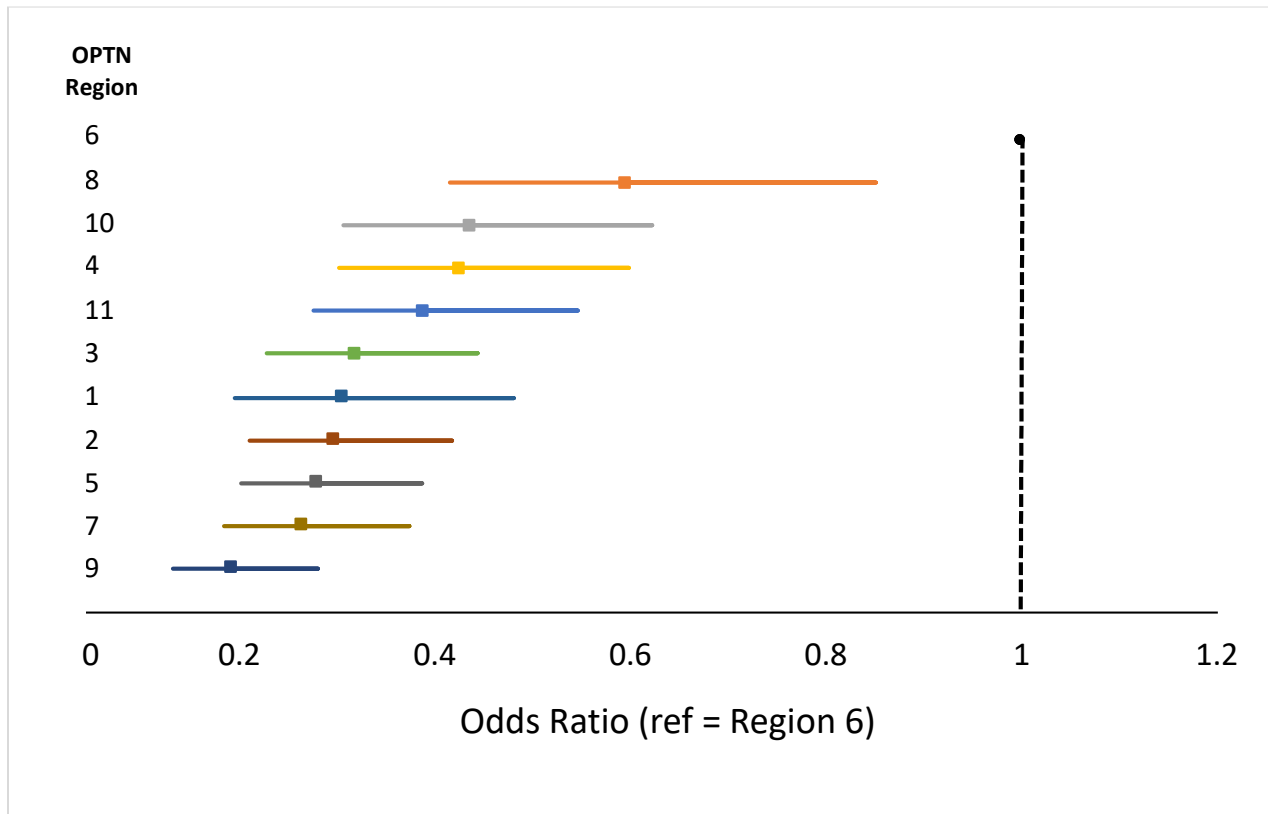

Odds were highest in Region 6, and lowest in Region 9 (odds ratio 0.19, 95% confidence interval 0.13-0.28).
