# Supplementary material
Source: PubMed Central journal article supplement (PMC8415134)
Supplement: NIHMS1734713-supplement-supplemetal_table.pdf [file NIHMS1734713-supplement-supplemetal_table.pdf]

**Supplemental Table 1:** Characteristics of recipients of KDPI $\leq$ 20% kidneys compared to recipients of KDPI $>$ 20% kidneys, among deceased donor kidney transplant recipients who were listed with EPTS $\leq$ 20%, January 1, 2015 – March 31, 2018 (n=5,574)

|                                                           |               | KDPI $\leq$ 20%<br>Recipients<br>(N = 2751) | KDPI $>$ 20%<br>Recipients<br>(N = 2823) | P-value           |
|-----------------------------------------------------------|---------------|---------------------------------------------|------------------------------------------|-------------------|
| Age in years (Standard deviation)                         |               | 36.18 (8.43)                                | 38.54 (8.72)                             | <b>&lt; 0.001</b> |
| Gender (% Female)                                         |               | 42.38%                                      | 47.79%                                   | <b>&lt; 0.001</b> |
| Race                                                      |               |                                             |                                          | 0.744             |
|                                                           | White         | 41.29%                                      | 40.81%                                   |                   |
|                                                           | Black         | 29.63%                                      | 28.83%                                   |                   |
|                                                           | Hispanic      | 20.36%                                      | 21.68%                                   |                   |
|                                                           | Asian         | 5.78%                                       | 5.99%                                    |                   |
|                                                           | Other         | 2.94%                                       | 2.69%                                    |                   |
| Median Time Since Listing in Days<br>(Standard deviation) |               | 176 (367)                                   | 150 (328)                                | <b>&lt; 0.001</b> |
| Pre-emptively Listed                                      |               | 22.65%                                      | 22.46%                                   | 0.867             |
| Insurance                                                 |               |                                             |                                          | 0.170             |
|                                                           | Private       | 34.61%                                      | 35.99%                                   |                   |
|                                                           | Public        | 64.59%                                      | 63.55%                                   |                   |
|                                                           | Other/Unknown | 0.80%                                       | 0.46%                                    |                   |

Values presented are mean (standard deviation), column %, or median (Interquartile Range).  
P-value is for chi-squared, t-test, or Kruskal-Wallis test.

Abbreviations: KDPI, Kidney Donor Profile Index; EPTS, Estimated Post-Transplant Survival
